# Supplementary material
Source: PubMed Central journal article supplement (PMC5888401)
Supplement: fj.201700672RR.sf1.pdf [file fj.201700672RR.sf1.pdf]

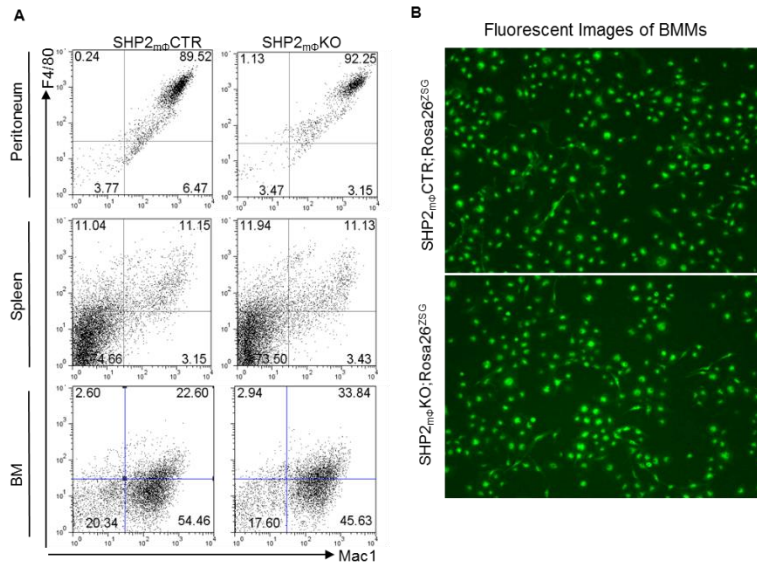

**Figure S1.** (A) Flow cytometric analysis demonstrating the comparable level of macrophage markers (Mac1 and F4/80) in the indicated cell populations from SHY2<sub>mΦ</sub>CTR and SHY2<sub>mΦ</sub>KO mice. Spl, Spleen; BM, bone marrow. (B) Fluorescent Images showing the similar morphology and number of BMMs derived from SHY2<sub>mΦ</sub>CTR;Rosa26<sup>ZSG</sup> and SHY2<sub>mΦ</sub>KO;Rosa26<sup>ZSG</sup> mice. Data shown (A, B) are a representative of the three (n=3) independent experiments.
